# Supplementary material
Source: PubMed Central journal article supplement (PMC9951169)
Supplement: 44222_2023_32_MOESM1_ESM.pdf [file 44222_2023_32_MOESM1_ESM.pdf]

---

# Device integration of electrochemical biosensors

---

In the format provided by the authors and unedited

---

## Device integration of electrochemical biosensors

*Jie Wu<sup>1,#</sup>, Hong Liu<sup>2,#</sup>, Weiwei Chen<sup>1,3</sup>, Biao Ma<sup>2</sup>, Huangxian Ju<sup>1,\*</sup>*

<sup>1</sup> State Key Laboratory of Analytical Chemistry for Life Science, School of Chemistry and Chemical Engineering, Nanjing University, Nanjing 210023, China

<sup>2</sup> State Key Laboratory of Bioelectronics, School of Biological Science and Medical Engineering, Southeast University, Nanjing 210096, China.

<sup>3</sup> School of Geographic and Biologic Information, Nanjing University of Posts and Telecommunications, Nanjing 210023, China

\*e-mail: hxju@nju.edu.cn

**Supplementary table 1 | Selected examples of commercial electrochemical biosensing devices**

| Product                                | Company                                            | Analyte                                                                                                                            | Sensing category             | Sample                        | Stage                    | Website                                                                                                           |
|----------------------------------------|----------------------------------------------------|------------------------------------------------------------------------------------------------------------------------------------|------------------------------|-------------------------------|--------------------------|-------------------------------------------------------------------------------------------------------------------|
| Cue™ Reader                            | Cue Health                                         | SARS-CoV-2 nucleic acids                                                                                                           | Amperometry                  | nasal sample                  | EUA by FDA               | www.cuehealth.com                                                                                                 |
| ePlex System                           | GenMark Diagnostics                                | SARS-CoV-2 nucleic acids, respiratory viral and bacterial organisms                                                                | Voltammetry (DPV or SWV)     | nasal sample                  | EUA by FDA               | www.genmarkdx.com                                                                                                 |
| Binx io                                | Binx Health                                        | Chlamydia trachomatis and neisseria gonorrhoeae DNA                                                                                | Voltammetry                  | female vaginal swab specimens | FDA approved             | mybinxhealth.com/point-of-care                                                                                    |
| BGA-102                                | Wondfo Biotech                                     | pCO <sub>2</sub> , pO <sub>2</sub> , pH, K <sup>+</sup> , Na <sup>+</sup> , Cl <sup>-</sup> , Ca <sup>2+</sup><br>Glucose, lactate | Potentiometry<br>Amperometry | blood                         | NMPA approved            | www.wondfo.org                                                                                                    |
| i-STAT                                 | Abbott                                             | pCO <sub>2</sub> , pO <sub>2</sub> , pH, K <sup>+</sup> , Na <sup>+</sup> , Cl <sup>-</sup> , Ca <sup>2+</sup><br>Glucose, lactate | Potentiometry<br>Amperometry | blood                         | FDA, CE, ISO approved    | www.globalpointofcare.abott/zh_cn/index.html                                                                      |
| Plus JET                               | BeneCheck                                          | Uric acid, glucose, cholesterol                                                                                                    | Amperometry                  | blood                         | NMPA approved            | www.benecheck.cn                                                                                                  |
| Uric-acid meter                        | Sinocare                                           | Uric acid                                                                                                                          | Amperometry                  | blood                         | CCC approved             | www.sinocareintl.com                                                                                              |
| Cholesterol meter                      | Acon                                               | Cholesterol                                                                                                                        | Amperometry                  | blood                         | CCC approved             | www.aconlabs.com                                                                                                  |
| Freestyle Libre                        | Abbott                                             | Glucose                                                                                                                            | Amperometry                  | interstitial fluid            | FDA, CE, ISO approved    | www.freestylelibre.com.au                                                                                         |
| Dexcom G6 CGM                          | Dexcom                                             | Glucose                                                                                                                            | Amperometry                  | interstitial fluid            | FDA approved             | www.dexcom.com                                                                                                    |
| Major glucose meters in global market  | Abbott<br>Roche<br>Life Scan<br>Bayer              | Glucose                                                                                                                            | Amperometry                  | blood                         | FDA, CE, ISO approved    | www.diabetescare.abott<br>www.rochediabetes.com<br>www.lifescan.com<br>www.bayer.com/en/                          |
| Major glucose meters in Chinese market | Bionime<br>Acon<br>Yuwell<br>Omron<br><br>Sinocare | Glucose                                                                                                                            | Amperometry                  | blood                         | NMPA approved            | www.bionime.com.cn<br>www.aconlabs.com.cn<br>www.yuwell.com<br>www.omronhealthcare.com.cn<br>www.sinocareintl.com |
| Tear glucose sensor                    | NovioSense                                         | Glucose                                                                                                                            | Amperometry                  | tear                          | Tested in human subjects | noviosense.com                                                                                                    |

EUA, Emergency Use Authorization; FDA, U.S. Food and Drug Administration; CE, Conformance Européenne; CCC, China Compulsory Certification; NMPA, China's National Medical Products Administration; ISO, International Standards Organization.

**Supplementary table 2 | Comparison of microfluidics-assisted and one-step affinity biosensors**

| <b>Sensing mode</b>                  | <b>Strategies</b>         | <b>Target: Receptors on WE</b> | <b>Signal amplification</b>                                 | <b>Uniqueness</b>                                               | <b>Required properties</b>                              | <b>Major limitation</b>            |
|--------------------------------------|---------------------------|--------------------------------|-------------------------------------------------------------|-----------------------------------------------------------------|---------------------------------------------------------|------------------------------------|
| Multi-step sandwich affinity sensing | Pump-assisted fluidics    | Proteins: antibody or antigen  | Enzyme- or nanomaterial labeled detection probes            | Good universality, applicable to all affinity detection systems | Pumps, valve, pipes, reservoirs, special detection cell | Difficult for device integration   |
|                                      | PDMS-based microfluidics  | Nucleic acids: DNA             |                                                             | Detection on a chip, easy commercialization                     | Microfluidic chip with biosensors, micropumps           | Expensive                          |
|                                      | Paper-based microfluidics |                                |                                                             | Self-pumping, simple, and cheap                                 | Origami paper chip with biosensors                      | Easy to be interfered              |
| One-step affinity sensing            | BF sensing                | Nucleic acids: DNA             | ---                                                         | sample-in-answer-out                                            | ---                                                     | low sensitivity                    |
|                                      | PBA sensing               | Proteins: DNA                  | Target-induced CRISPR/Cas12a cleaving<br>DNA amplifications | High sensitivity, wash-free detection                           | Disposable reaction tube                                | Unable for "sample-in-answer-out " |
|                                      |                           |                                |                                                             | DNA assisted one-step immunoassay                               | Disposable reaction tube                                | Complex solution system            |

WE, working electrode.
